# Supplementary material for: Anticancer Activity of Encapsulated Pearl Millet Polyphenol-Rich Extract against Proliferating and Non-Proliferating Breast Cancer Cells In Vitro
Source: MDPI journal article supplement (doi:10.3390/cancers16091750), 2024-04-30
Supplement: s1 [file s1]

## Supplementary materials

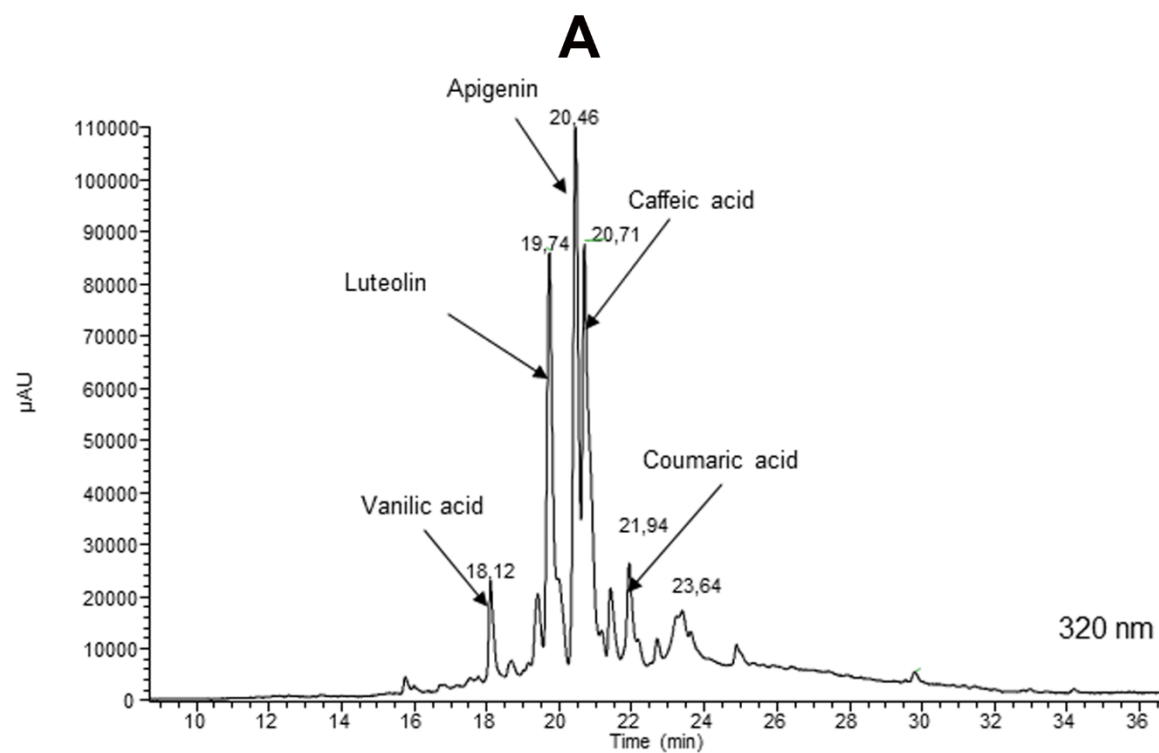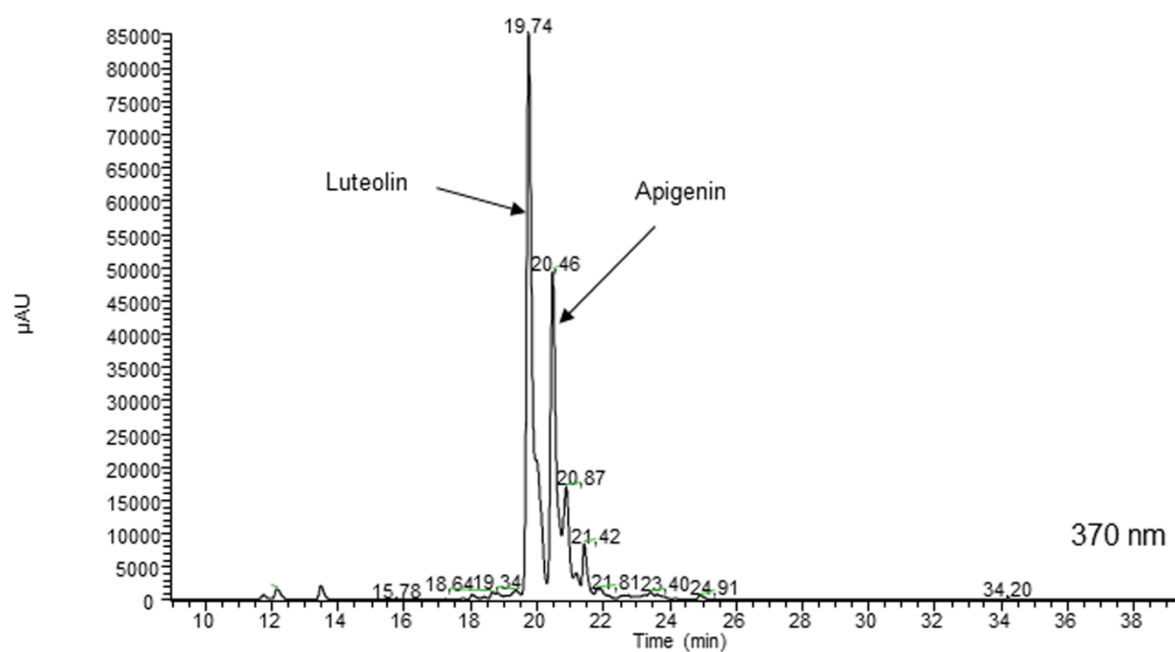

**Soluble phenolics**

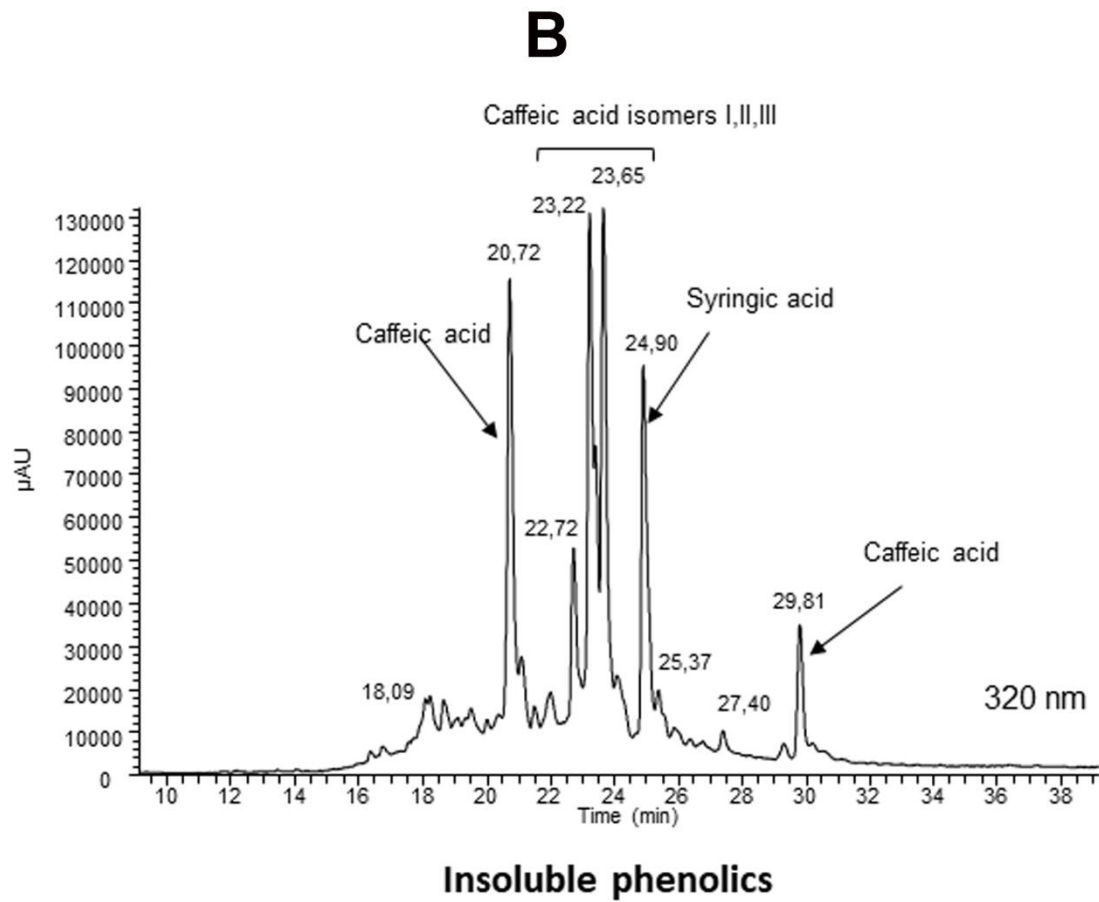

**Supplementary Figure S1.** HPLC chromatograms of pearl millet polyphenol extracts dissolved in ethanol, measured at different wavelengths (320 nm for cinnamic acids and 370 nm for flavonoids). The fractions of soluble (A) and insoluble (B) phenolics are shown.

# A

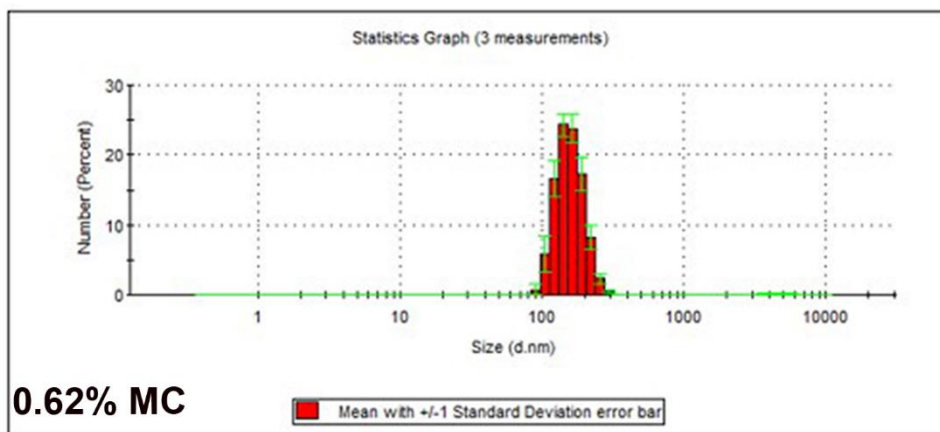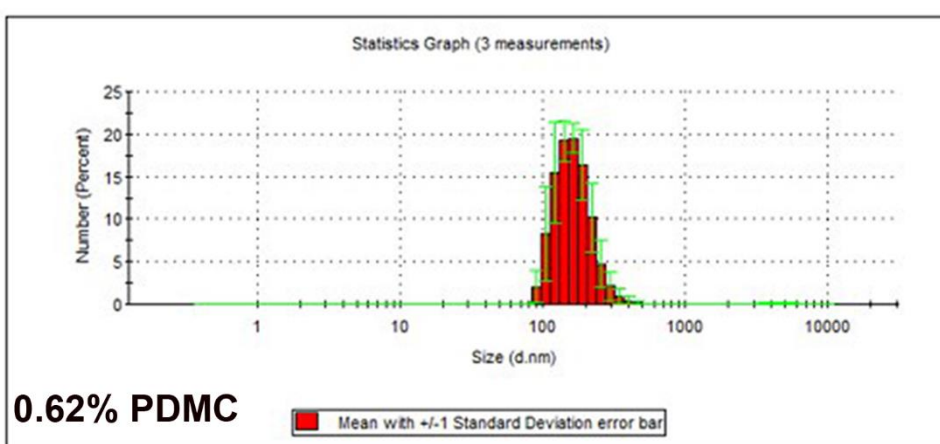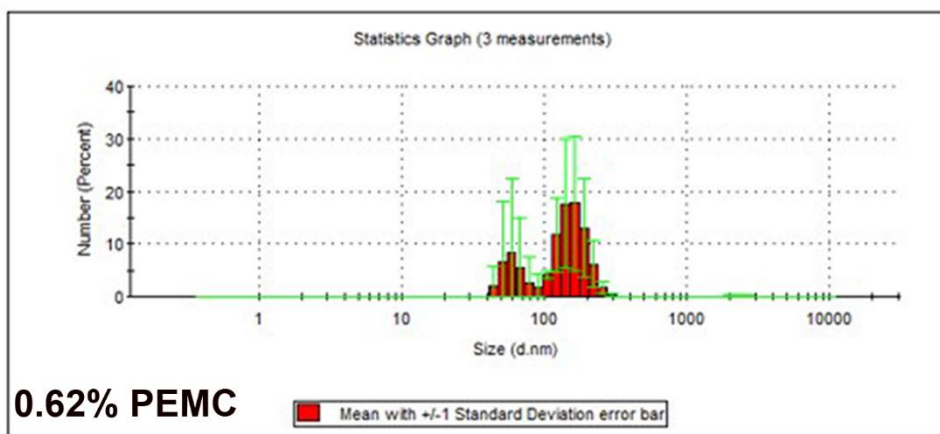

# B

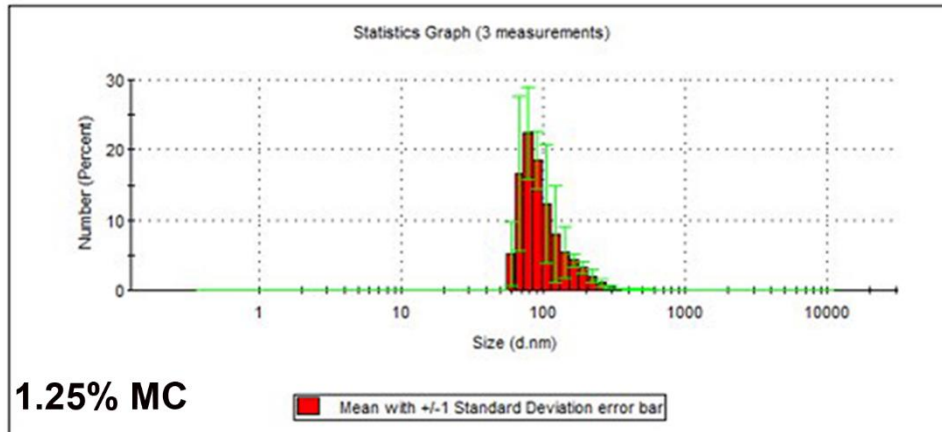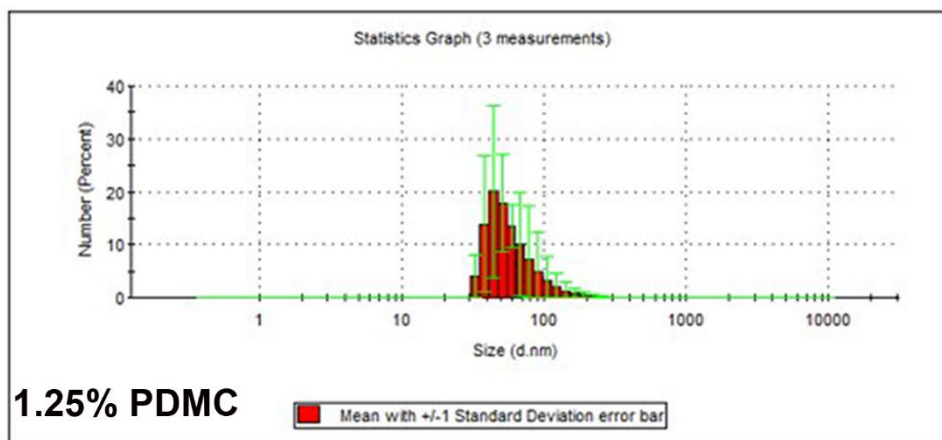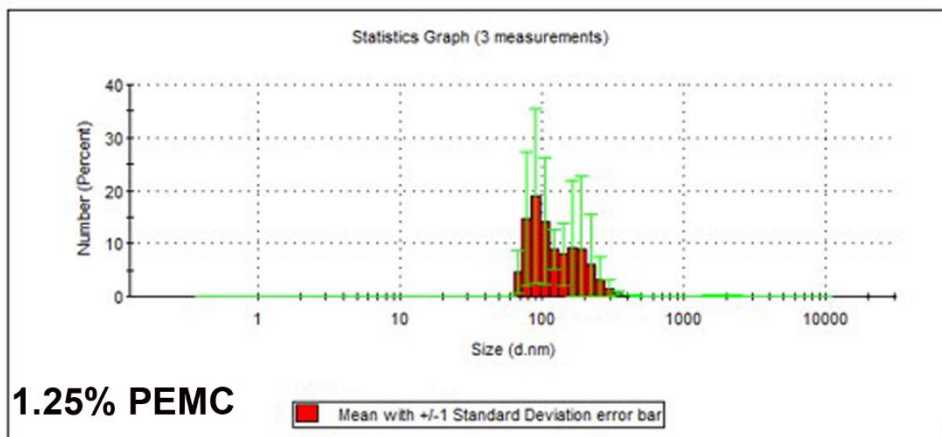

**C**

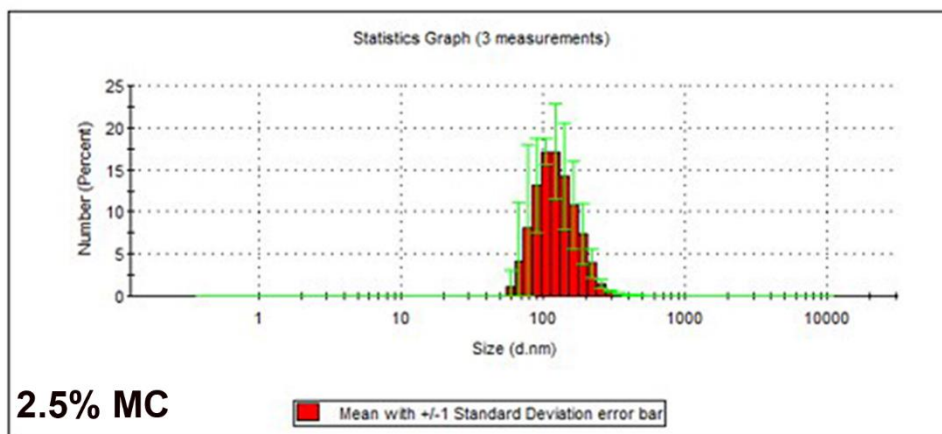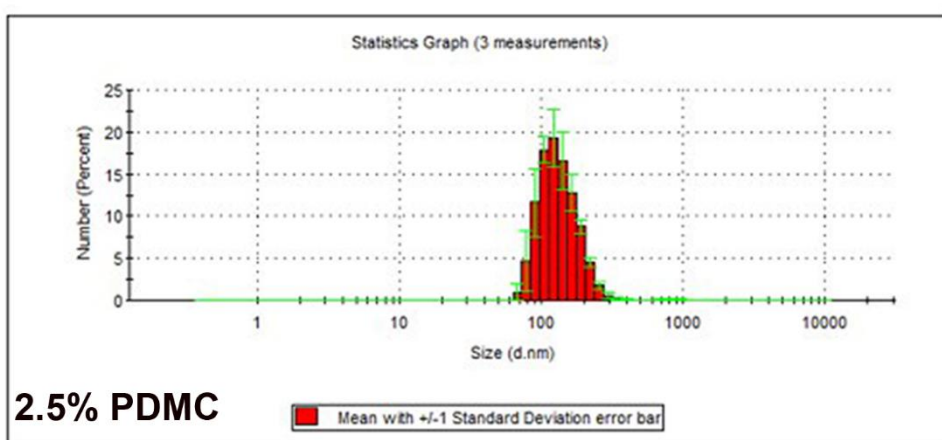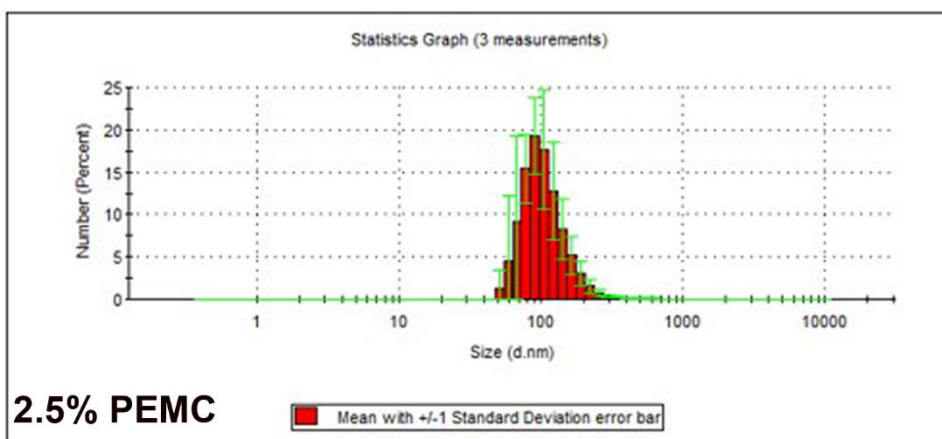

**Supplementary Figure S2.** Size distribution of microcapsules MC, PDMC, and PEMC at the concentrations of 0.62% (A), 1.25% (B), and 2.5% (C). Size distribution of microcapsules was analyzed using dynamic light scattering (DLS). Microcapsule size is expressed as a hydrodynamic diameter.

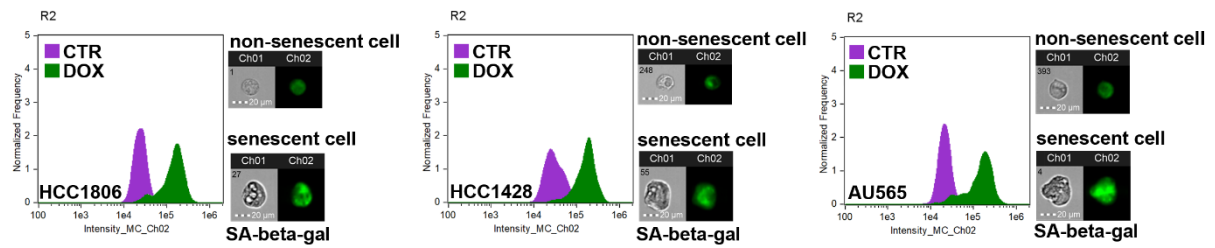

**Supplementary Figure S3.** Confirmation of the activation of drug-induced senescence program in three breast cancer cell lines using senescence-associated beta-galactosidase (SA-beta-gal) assay and imaging flow cytometry. Representative histograms and microphotographs are shown. CTR, control conditions; DOX, treatment with doxorubicin.

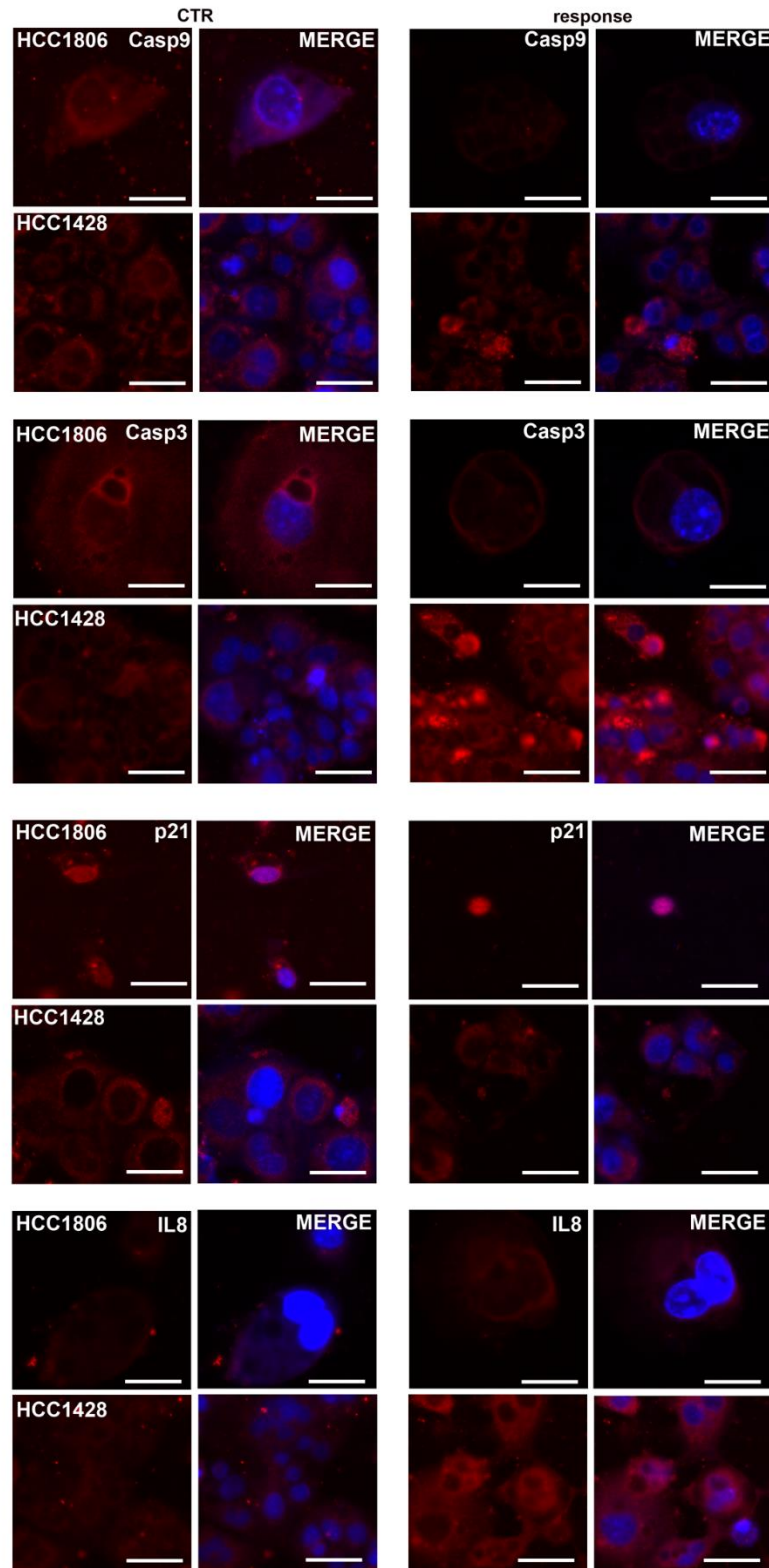

**Supplementary Figure S4.** Representative microphotographs of non-treated (CTR) and treated HCC1806 and HCC1428 cells (response) of Casp9, Casp3, p21, and IL8 immunostaining. Immunosignals are presented in red (immunostaining with dedicated primary antibodies and fluorochrome conjugated secondary antibodies). Nuclei are presented in blue (Hoechst 33342 staining). Objective 20 $\times$ .

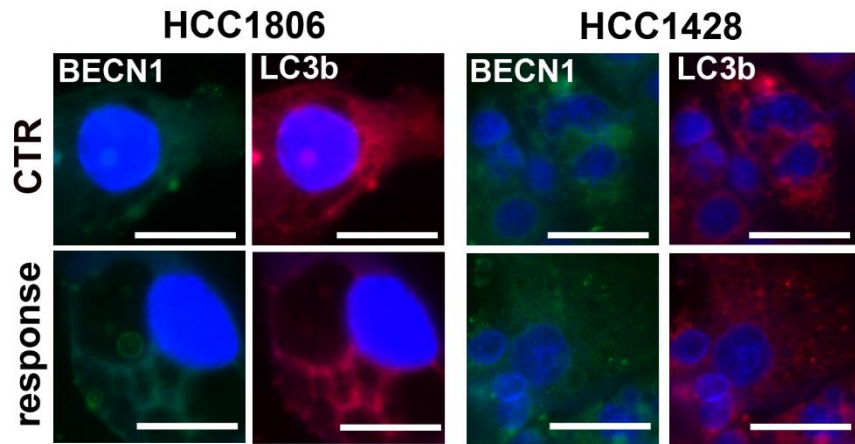

**Supplementary Figure S5.** Representative microphotographs of non-treated (CTR) and treated HCC1806 and HCC1428 cells (response) of BECN1 and LC3b immunostaining. Immunosignals are presented in green and red, respectively (immunostaining with dedicated primary antibodies and fluorochrome conjugated secondary anti-bodies). Nuclei are presented in blue (Hoechst 33342 staining). Objective 20×.



**Supplementary Table S1.** Raman vibrational frequencies of the studied samples (MC, MC\*, PDMC\*, PEMC\*).

| Raman shift (cm <sup>-1</sup> ) |           |           |           | Vibrational Assignment                             | Molecules                          |
|---------------------------------|-----------|-----------|-----------|----------------------------------------------------|------------------------------------|
| MC                              | MC*       | PDMC*     | PEMC*     |                                                    |                                    |
| -                               | -         | 307       | 309       | δ(CCC)                                             | polyphenol                         |
| -                               | 366       | 358       | 358       | ring bending modes                                 | FL                                 |
| -                               | 406       | 410       | 410       | ring bending modes                                 | FL                                 |
| 453                             | 453 (sh)  | 451 (sh)  | 450 (sh)  | -                                                  | microcapsule molecules             |
| -                               | 467       | 464       | 462       | ring bending modes                                 | FL                                 |
| 493                             | 492       | 495       | 492       | COO, skeletal vibration                            | microcapsule molecules, polyphenol |
| 604                             | 602       | 603 (sh)  | 603 (sh)  | -                                                  | microcapsule molecules             |
| -                               | 643       | 642       | 642       | ring bending modes                                 | FL                                 |
| -                               | -         | 677       | 678       | γ(OH)                                              | polyphenol                         |
| -                               | -         | 710       | 713       | ν(ring breathing)                                  | polyphenol                         |
| 742                             | 742       | 741       | 743       | CC skeletal deformation, δ (CH <sub>2</sub> )      | TSA                                |
| -                               | 768       | 765       | 763       | γ (C–H) bending                                    | FL                                 |
| 844                             | 845       | 845       | 846       | CC deformation/OCO wagging/CH vibrations with C–OH | TSA                                |
| 867                             | 862 (sh)  | 864       | 864 (sh)  | -                                                  | microcapsule molecules             |
| 891                             | 891       | 991       | 893       | CCH deformation                                    | TSA                                |
| -                               | 938       | 935       | 938       | CH <sub>2</sub> rocking                            | FL                                 |
| 972                             | 969       | 969       | 966       | CCH deformation                                    | TSA                                |
| 1083                            | 1083      | 1082      | 1083      | ν (C–C)                                            | TSA, linseed oil                   |
| -                               | 1171      | 1173      | 1172      | δ (C–H) bending                                    | FL                                 |
| 1265                            | 1268      | 1268      | 1268      | ν (C–O) in C–O–C, δ (=C–H)                         | linseed oil                        |
| 1305                            | 1302 (sh) | 1302 (sh) | 1301 (sh) | COH deformation, ν (CCO)                           | TSA                                |
| -                               | 1312      | 1311      | 1311      | C–C xanthene tension                               | FL                                 |
| -                               | -         | 1417      | 1418      | ν(ring), δ(OH)                                     | polyphenol                         |
| 1444                            | 1441      | 1443      | 1444      | δ (C–H)                                            | TSA, linseed oil                   |
| -                               | 1506      | 1506      | 1507      | ν (C=C) ring                                       | FL                                 |
| 1659                            | 1659      | 1659      | 1659      | ν (C=C), ν (C–O)                                   | TSA, linseed oil                   |
| 1747                            | 1747      | 1746      | 1747      | ν (C=O)                                            | linseed oil                        |
| 2853                            | 2853      | 2853      | 2853      | ν (C–H)                                            | TSA, linseed oil                   |
| 2890                            | 2890      | 2890      | 2890      | ν (C–H)                                            | TSA, linseed oil                   |
| -                               | -         | 2922      | 2920      | ν (C–H)                                            | polyphenol                         |

|      |           |           |           |                      |                         |
|------|-----------|-----------|-----------|----------------------|-------------------------|
| 2937 | 2937 (sh) | 2937 (sh) | 2937 (sh) | $\nu$ (C–H)          | TSA, linseed oil        |
| 3015 | 3013      | 3013      | 3014 (sh) | $\nu$ (C–H) in C=C–H | linseed oil, polyphenol |

sh, shoulder;  $\nu$ , stretching;  $\delta$ , in-plane bending/deformation;  $\gamma$ , out-of-plane bending; the assignments were made on the basis of references [27-30].
